# Supplementary material for: Phytochemical Profiling and Anti-Fibrotic Activities of the Gemmotherapy Bud Extract of Corylus avellana in a Model of Liver Fibrosis on Diabetic Mice
Source: MDPI journal article supplement (doi:10.3390/biomedicines11061771), 2023-06-20
Supplement: s1 [file s1]

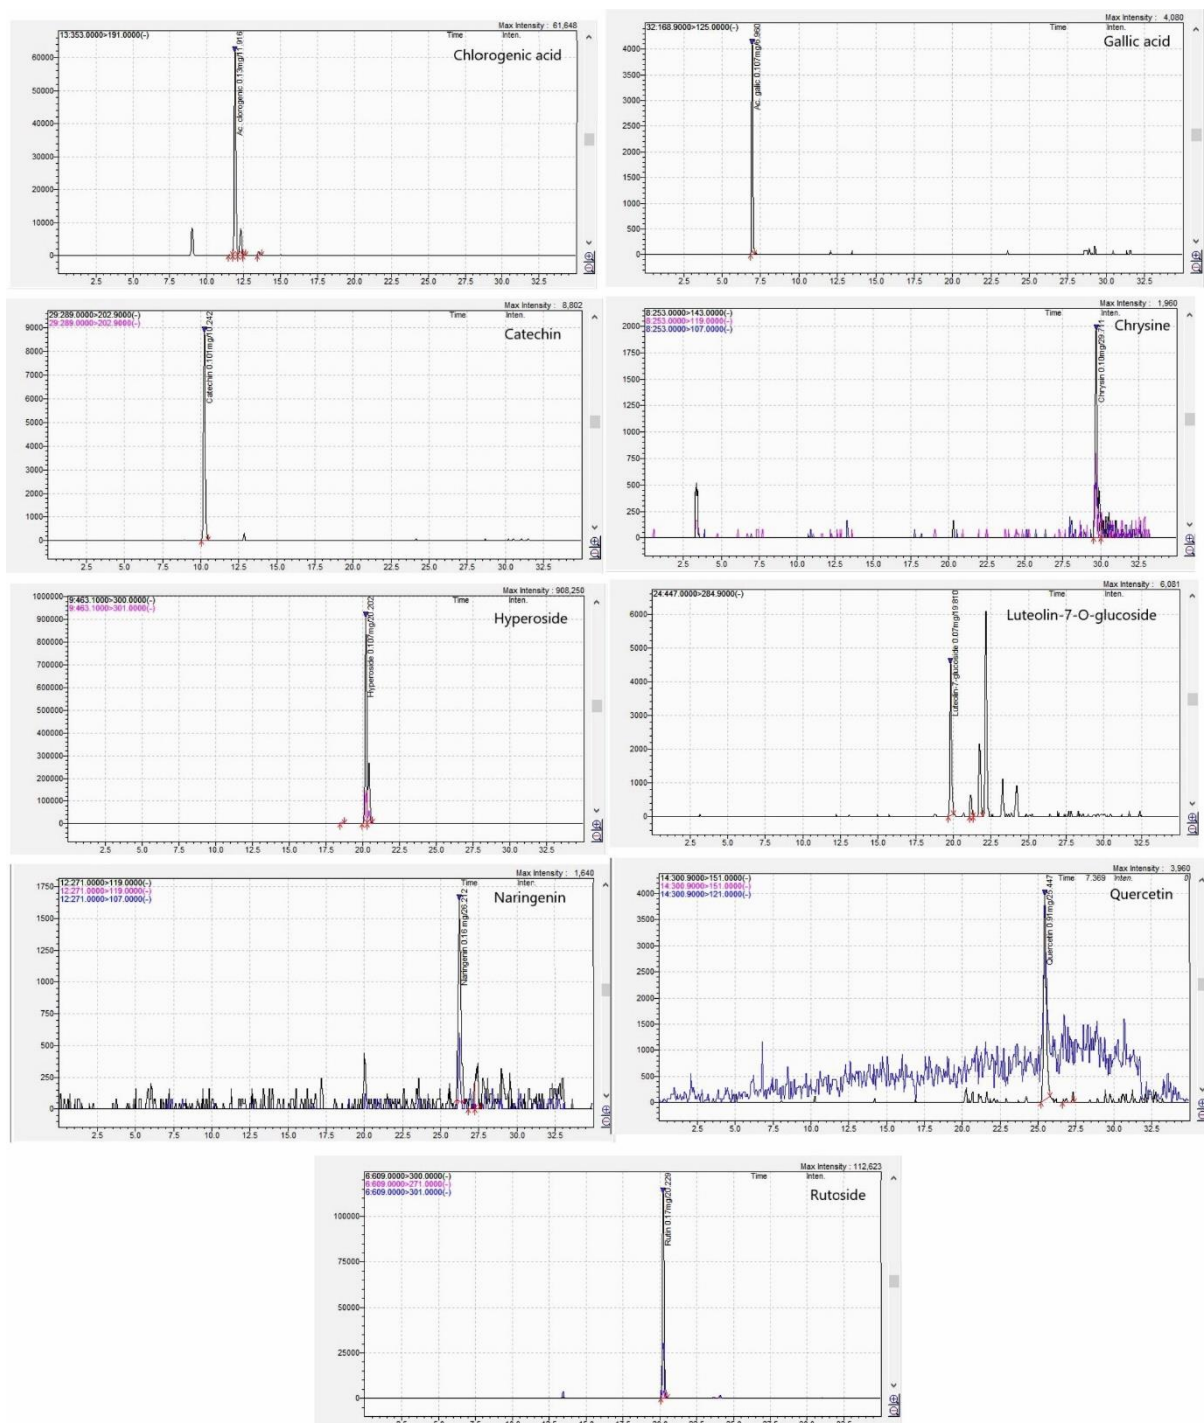

**Figure S1:** The LC/MS chromatograms of *Corylus avellana* gemmotherapy extract (Feb. 2019).

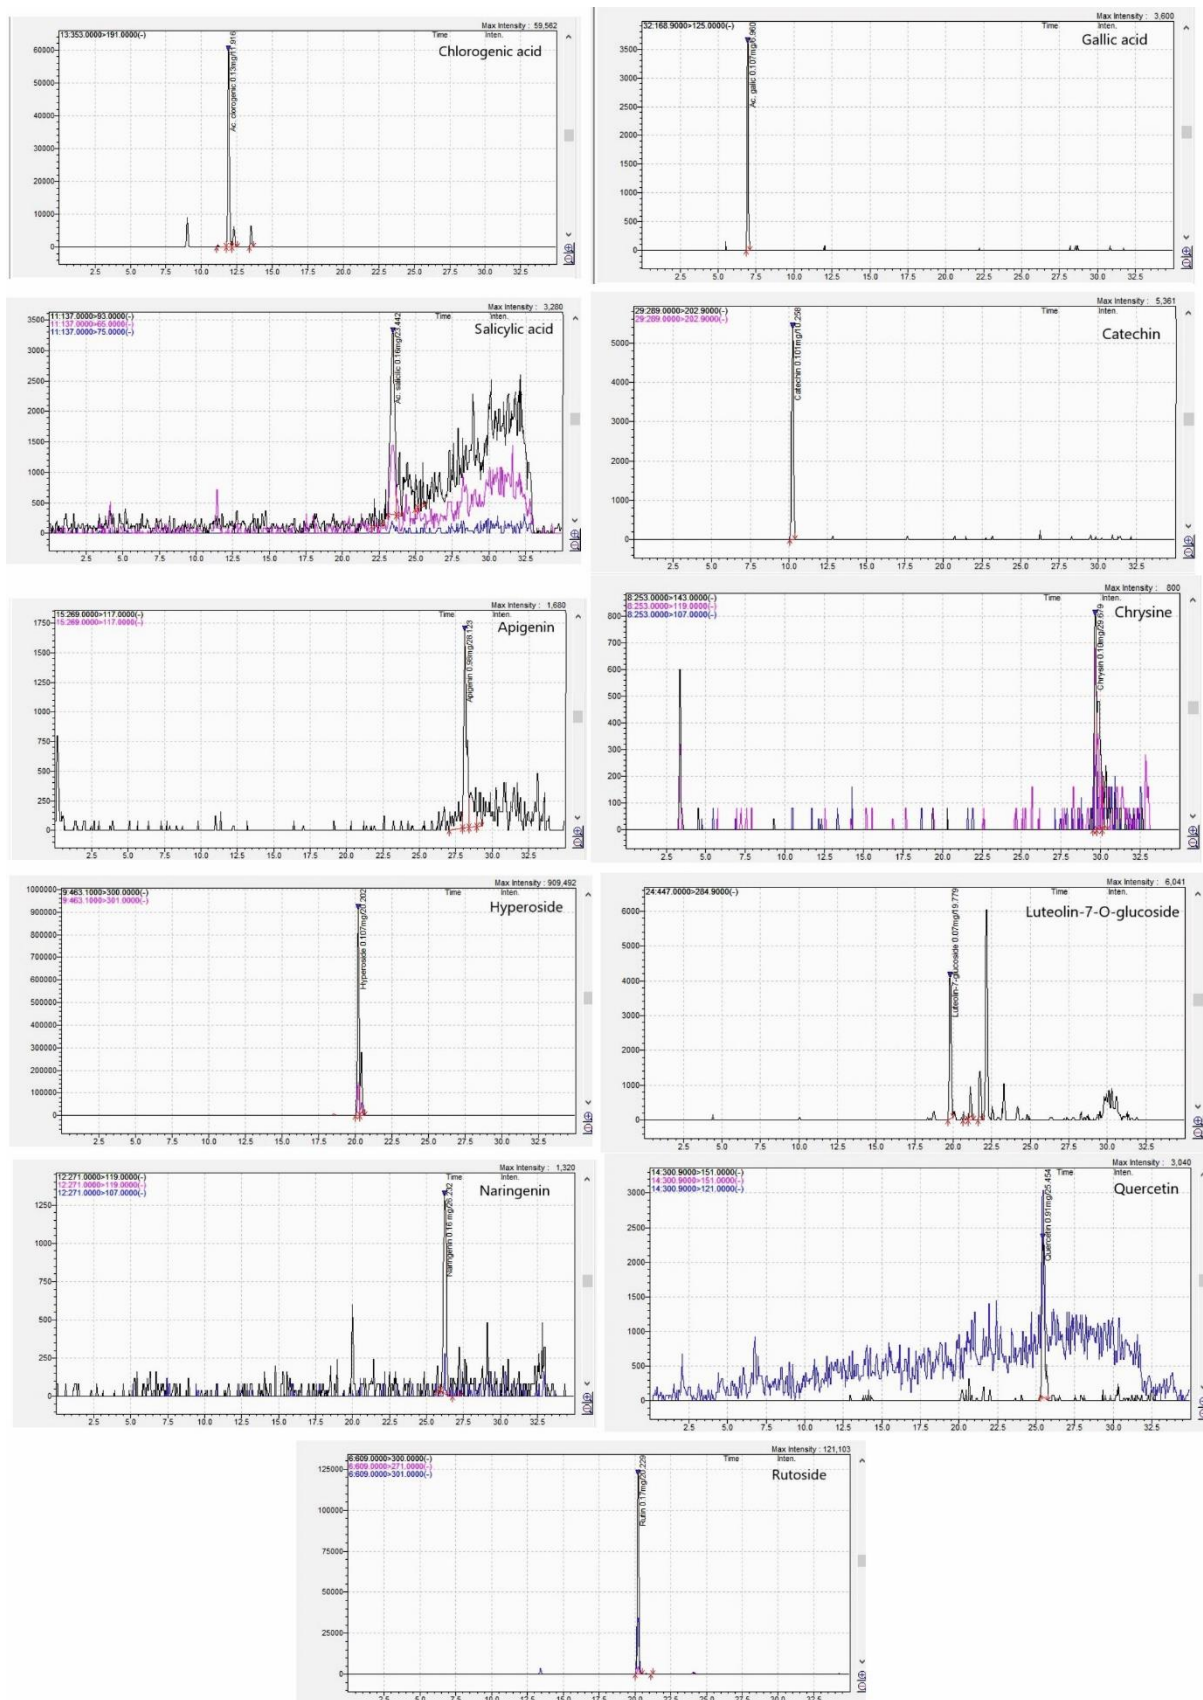

**Figure S2:** The LC/MS chromatograms of *Corylus avellana* gemmotherapy extract (Mar. 2019).

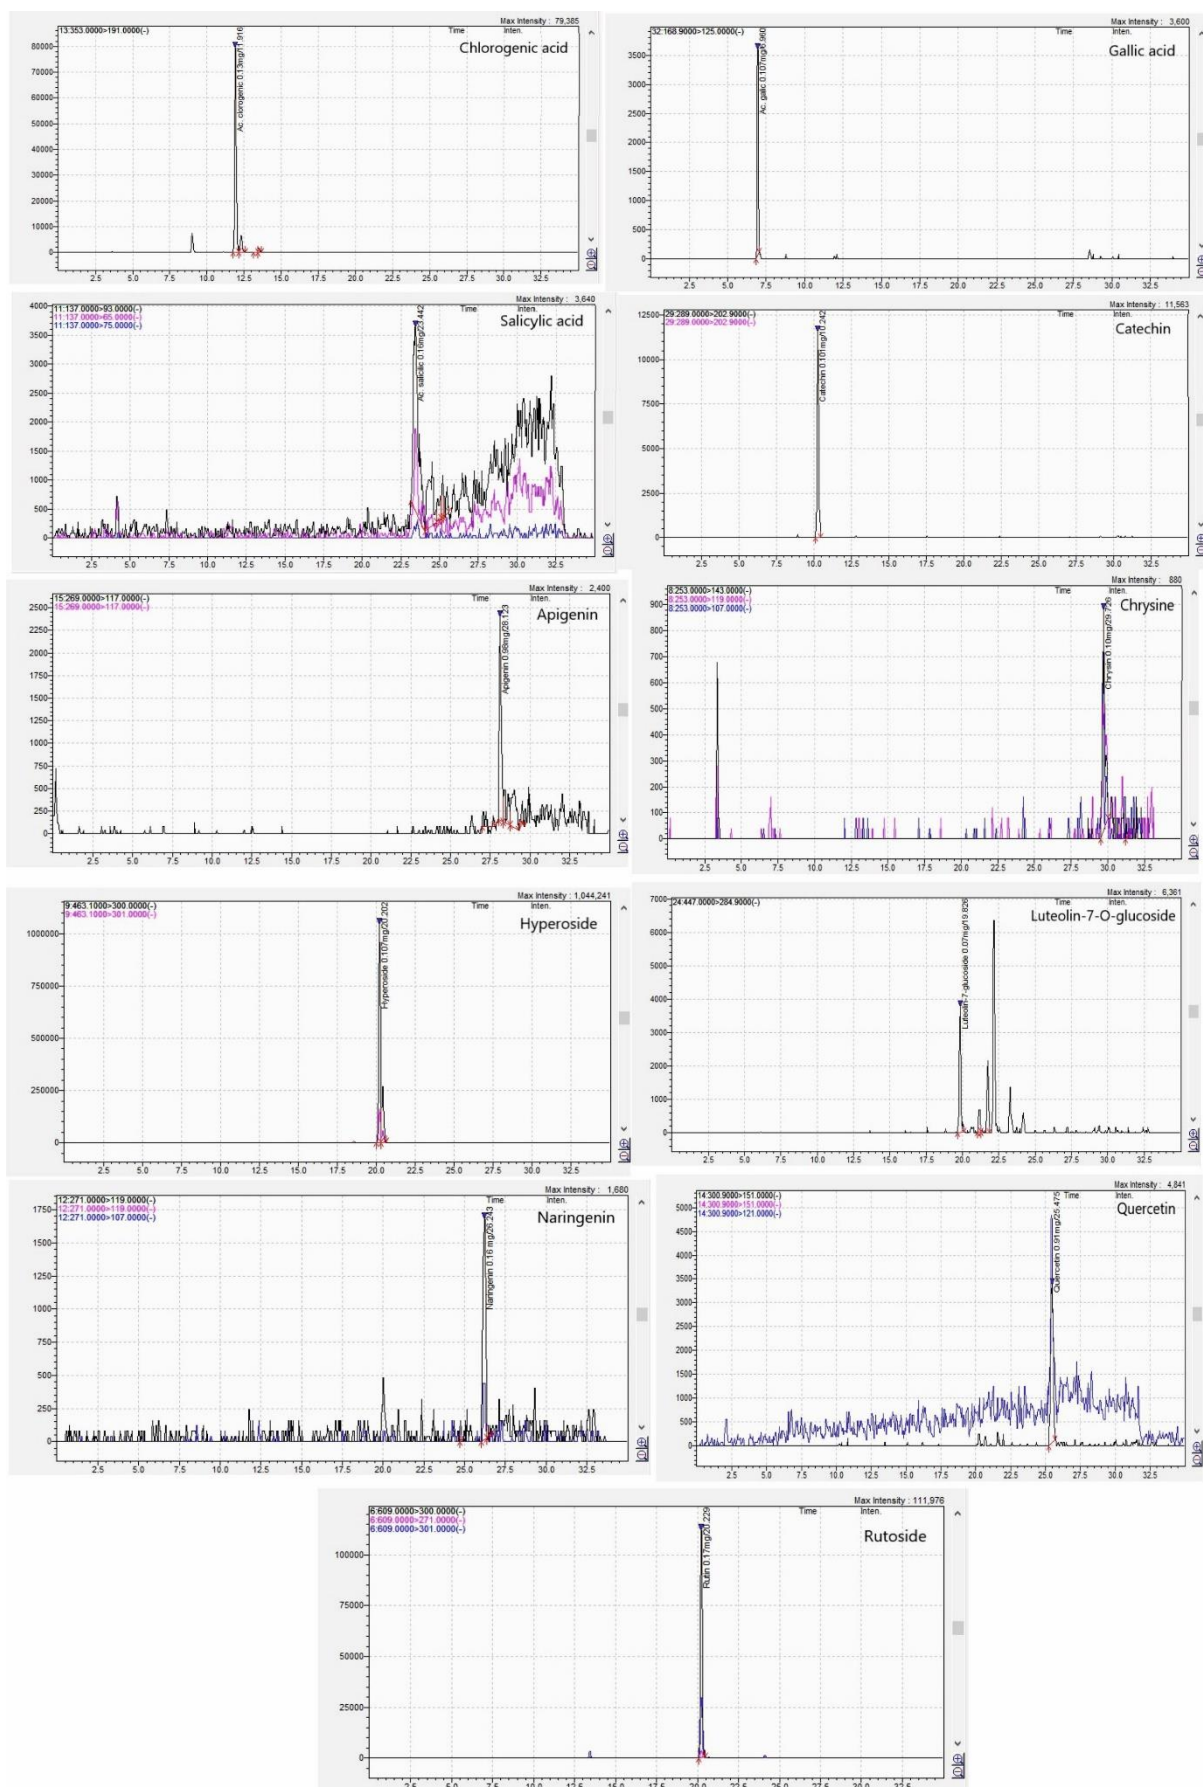

**Figure S3:** The LC/MS chromatograms of *Corylus avellana* gemmotherapy extract (Jan. 2020).



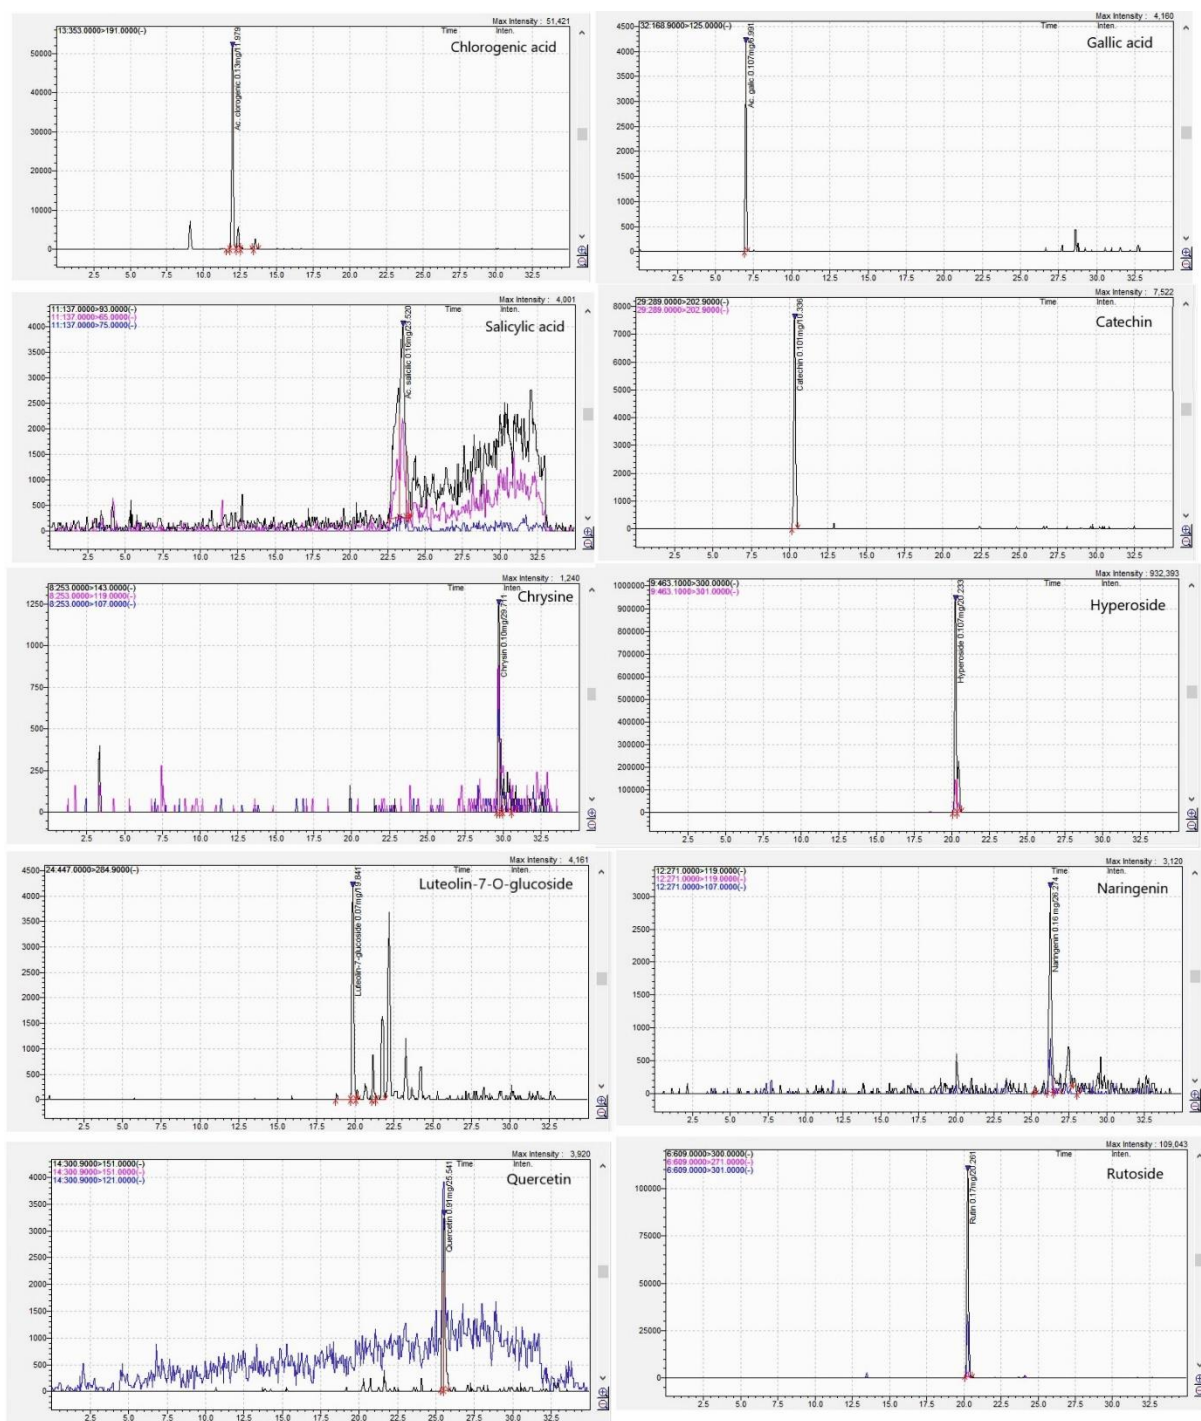

**Figure S4:** The LC/MS chromatograms of *Corylus avellana* gemmotherapy extract (Feb. 2020).

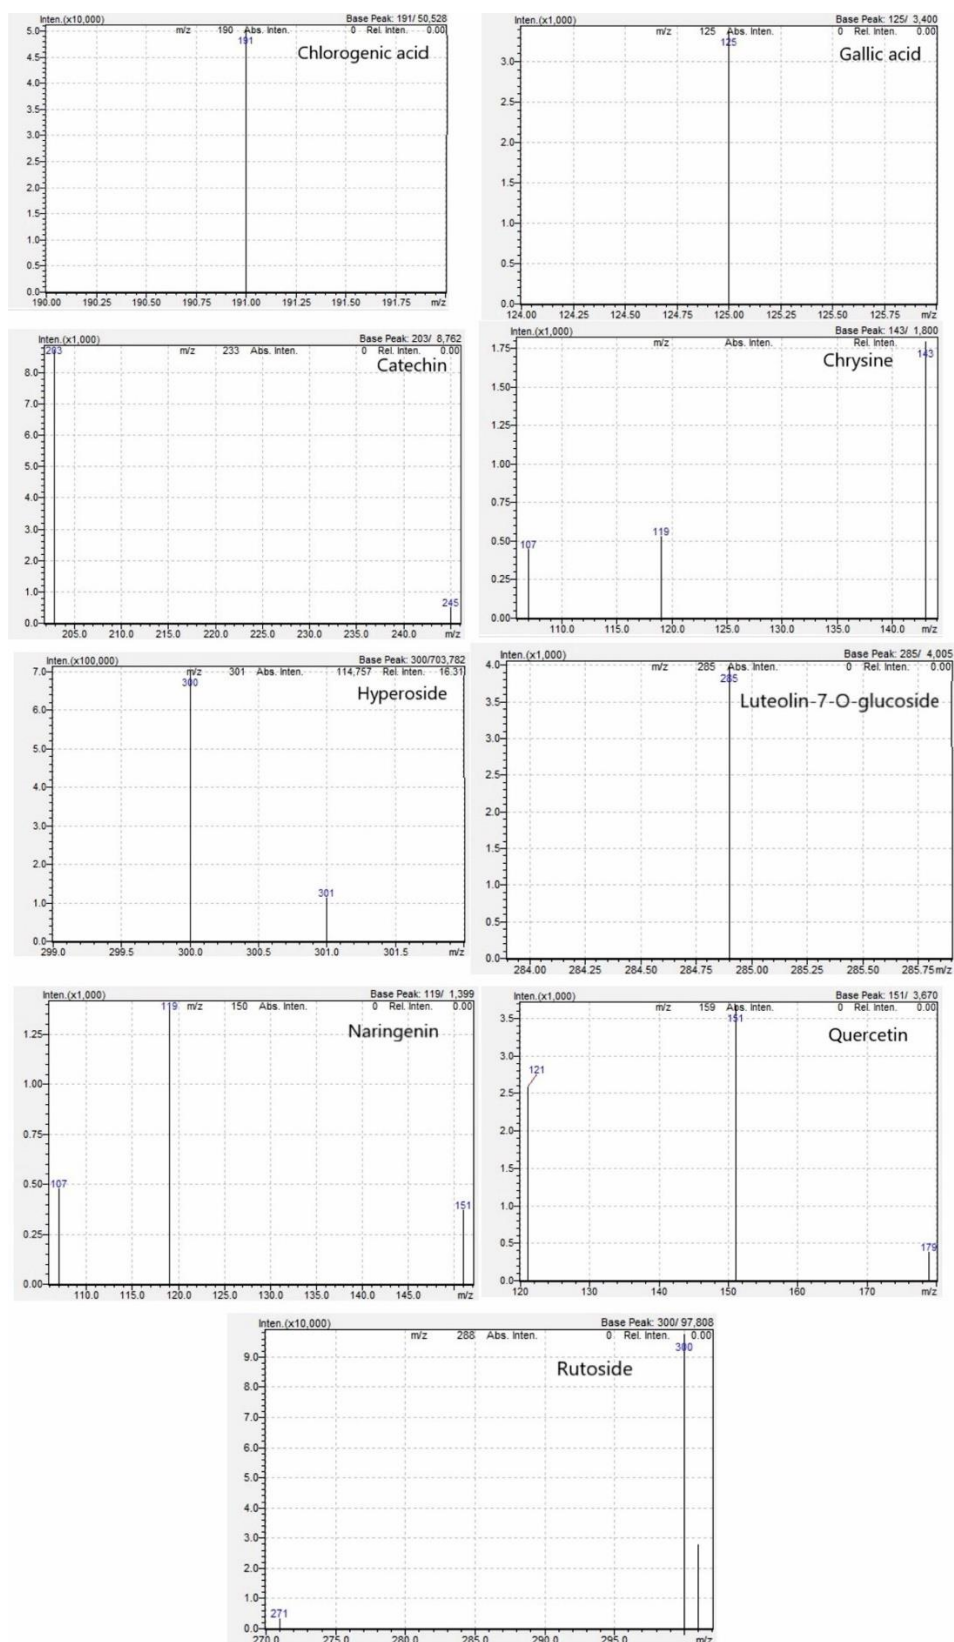

**Figure S5:** MS spectra of the identified compounds from *Corylus avellana* gemmotherapy extract (Feb. 2019).

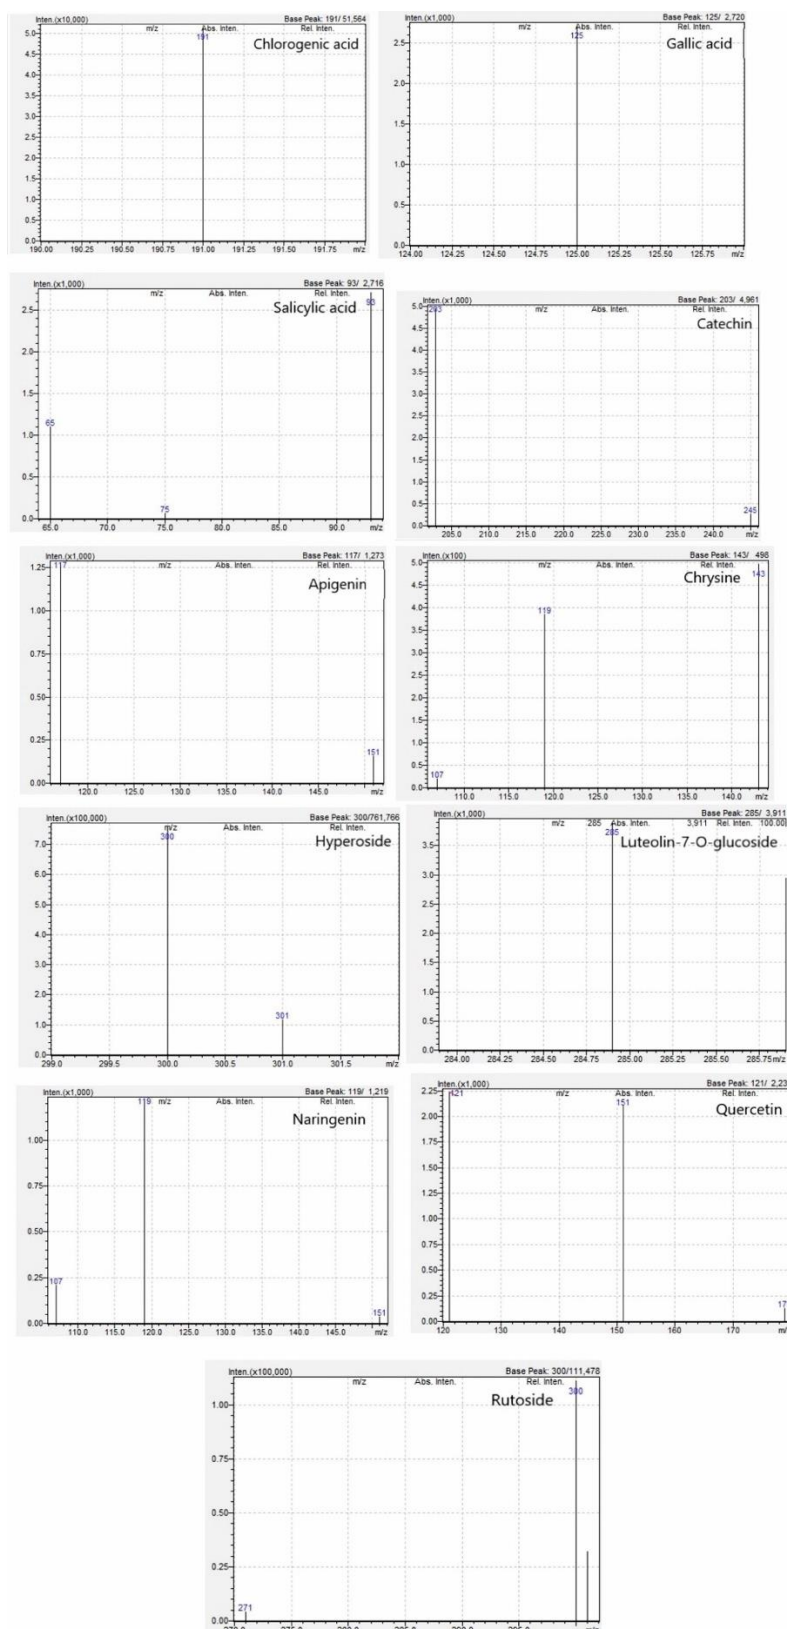

**Figure S6:** MS spectra of the identified compounds from *Corylus avellana* gemmotherapy extract (March 2019).

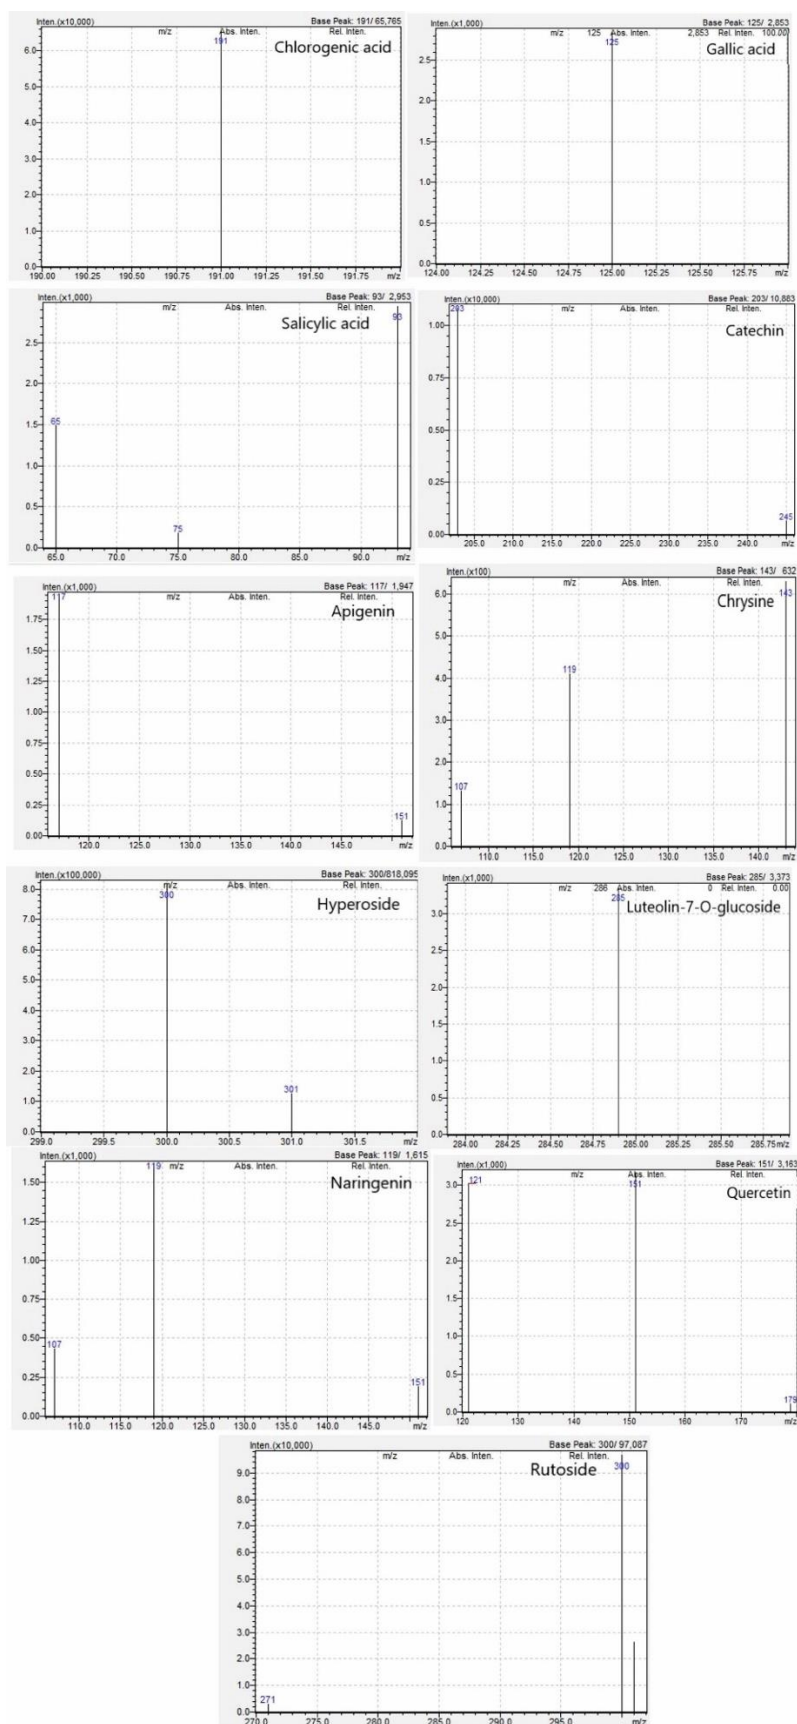

**Figure S7:** MS spectra of the identified compounds from *Corylus avellana* gemmotherapy extract (Jan. 2020).



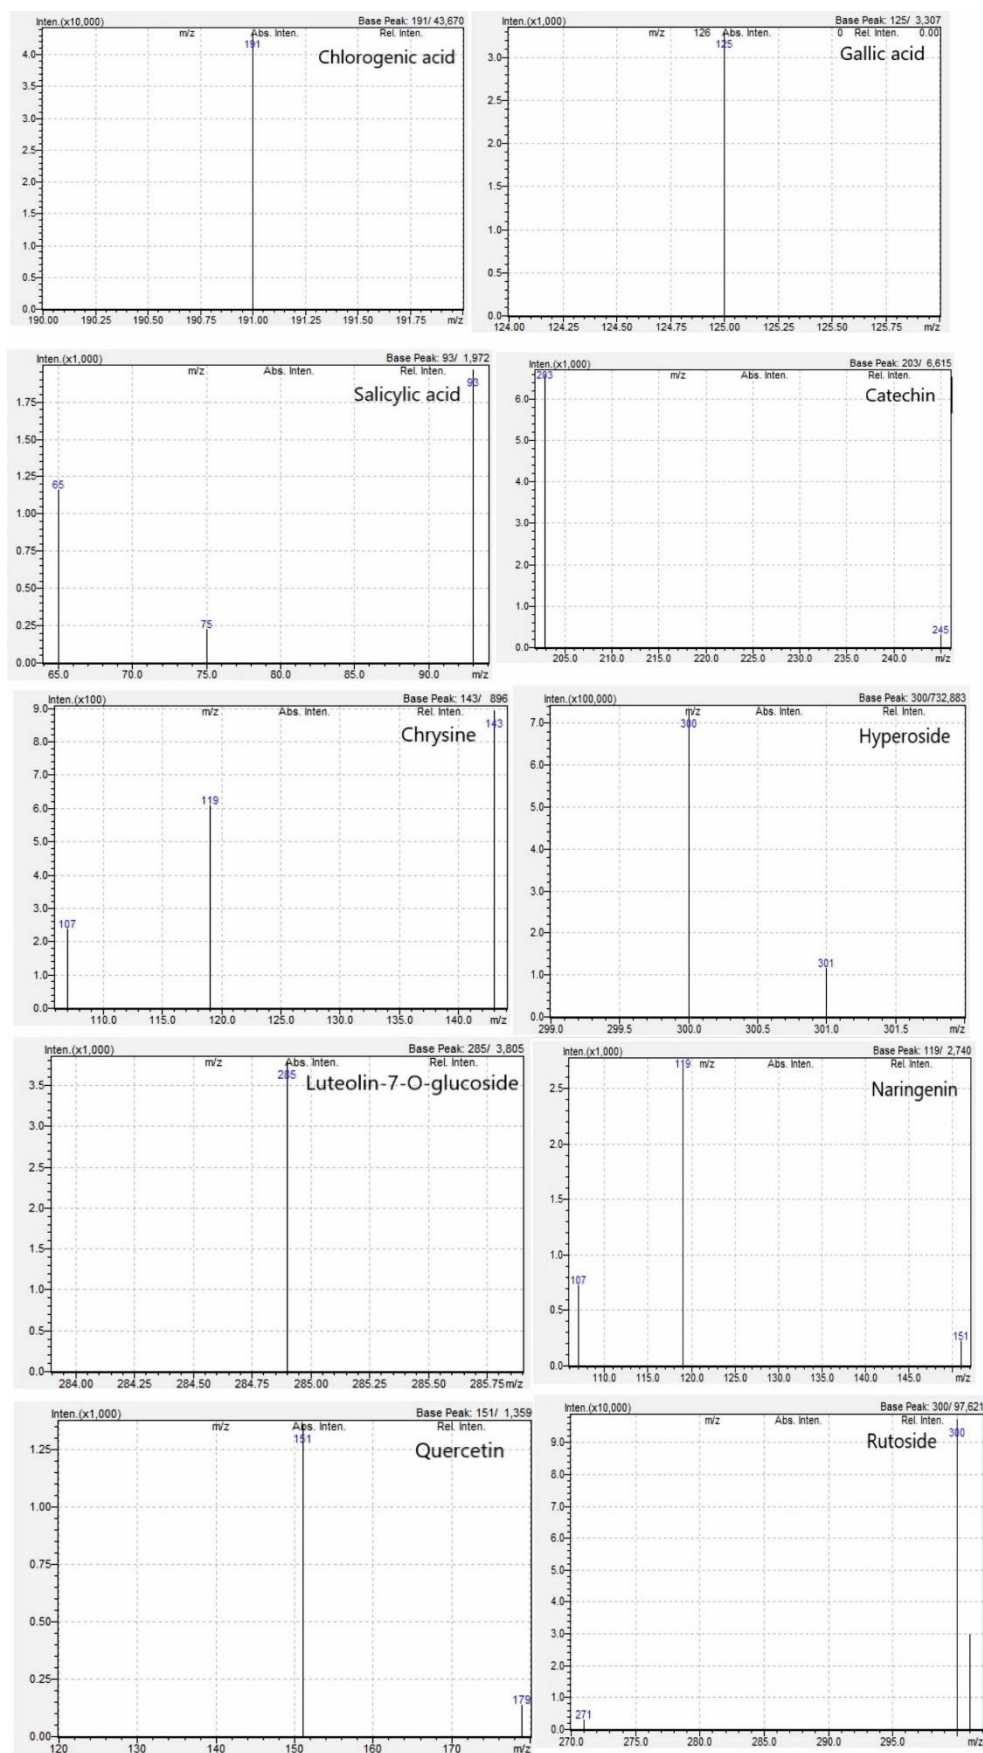

**Figure S8:** MS spectra of the identified compounds from *Corylus avellana* gemmotherapy extract (Feb. 2020).



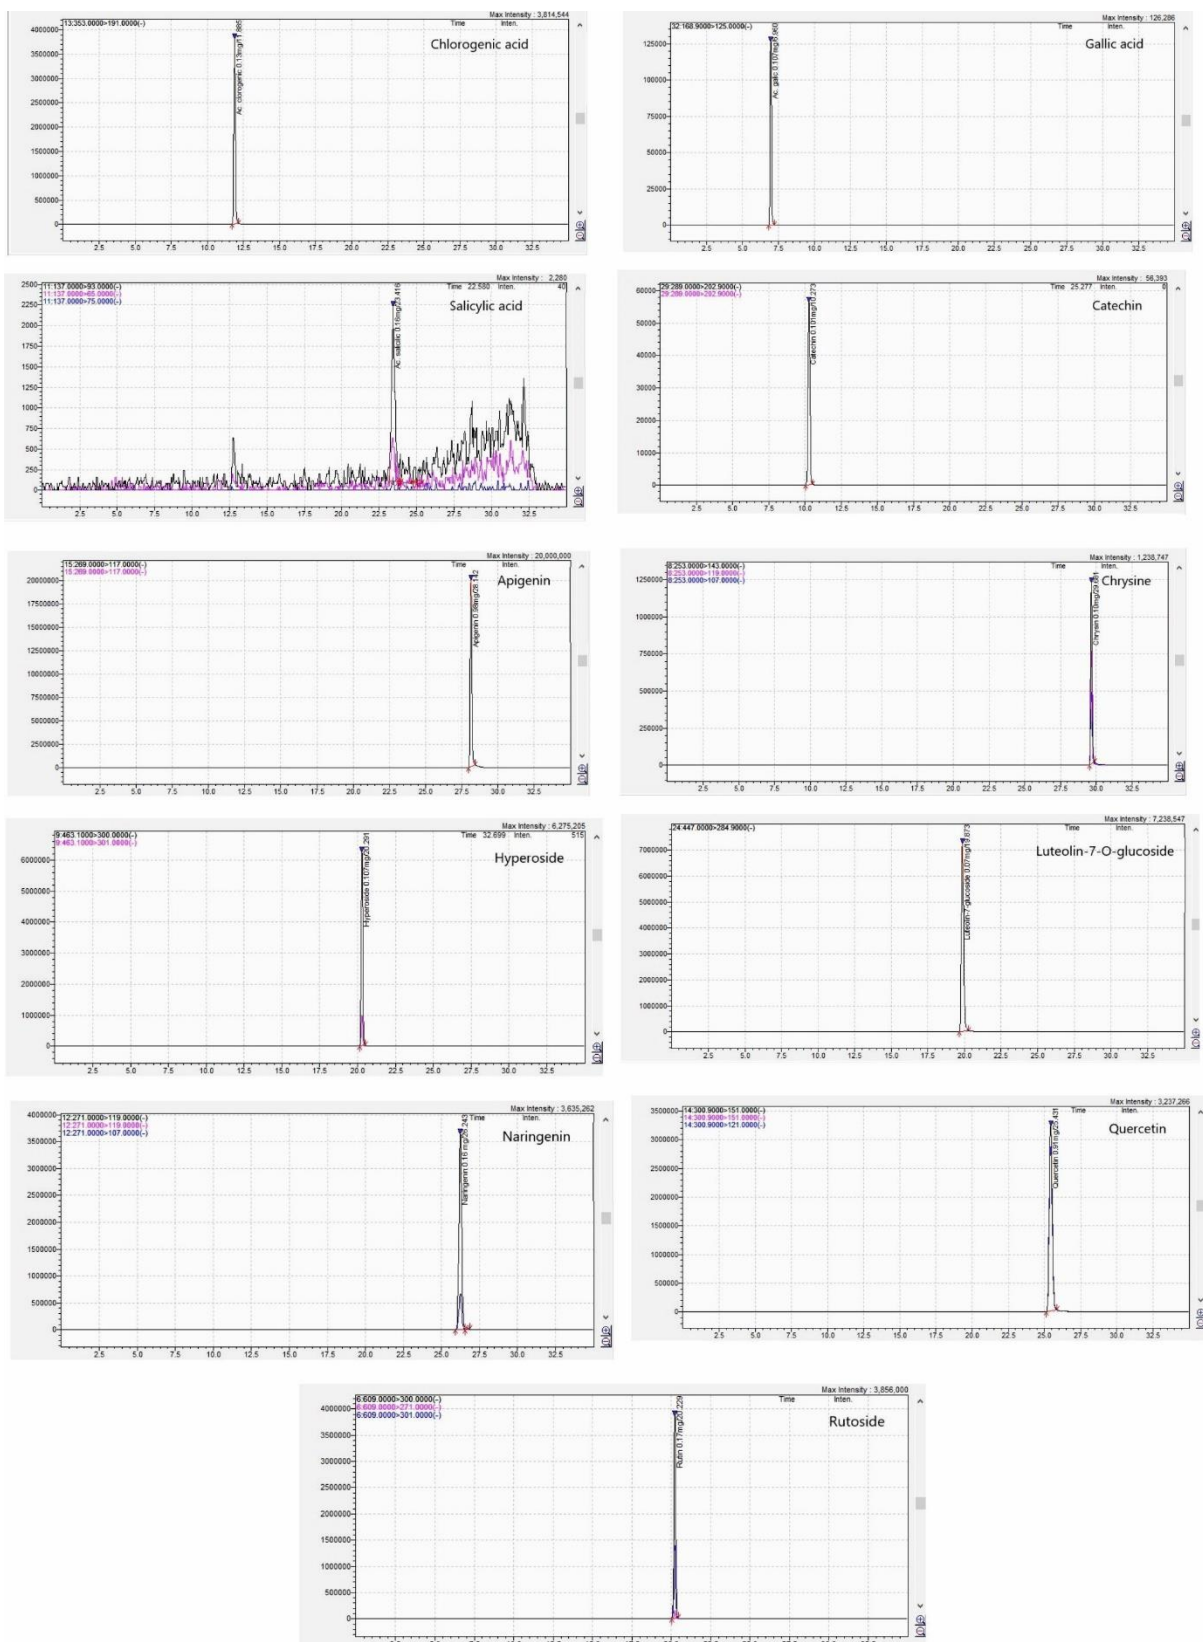

**Figure S9:** LC/MS chromatograms of the standards.

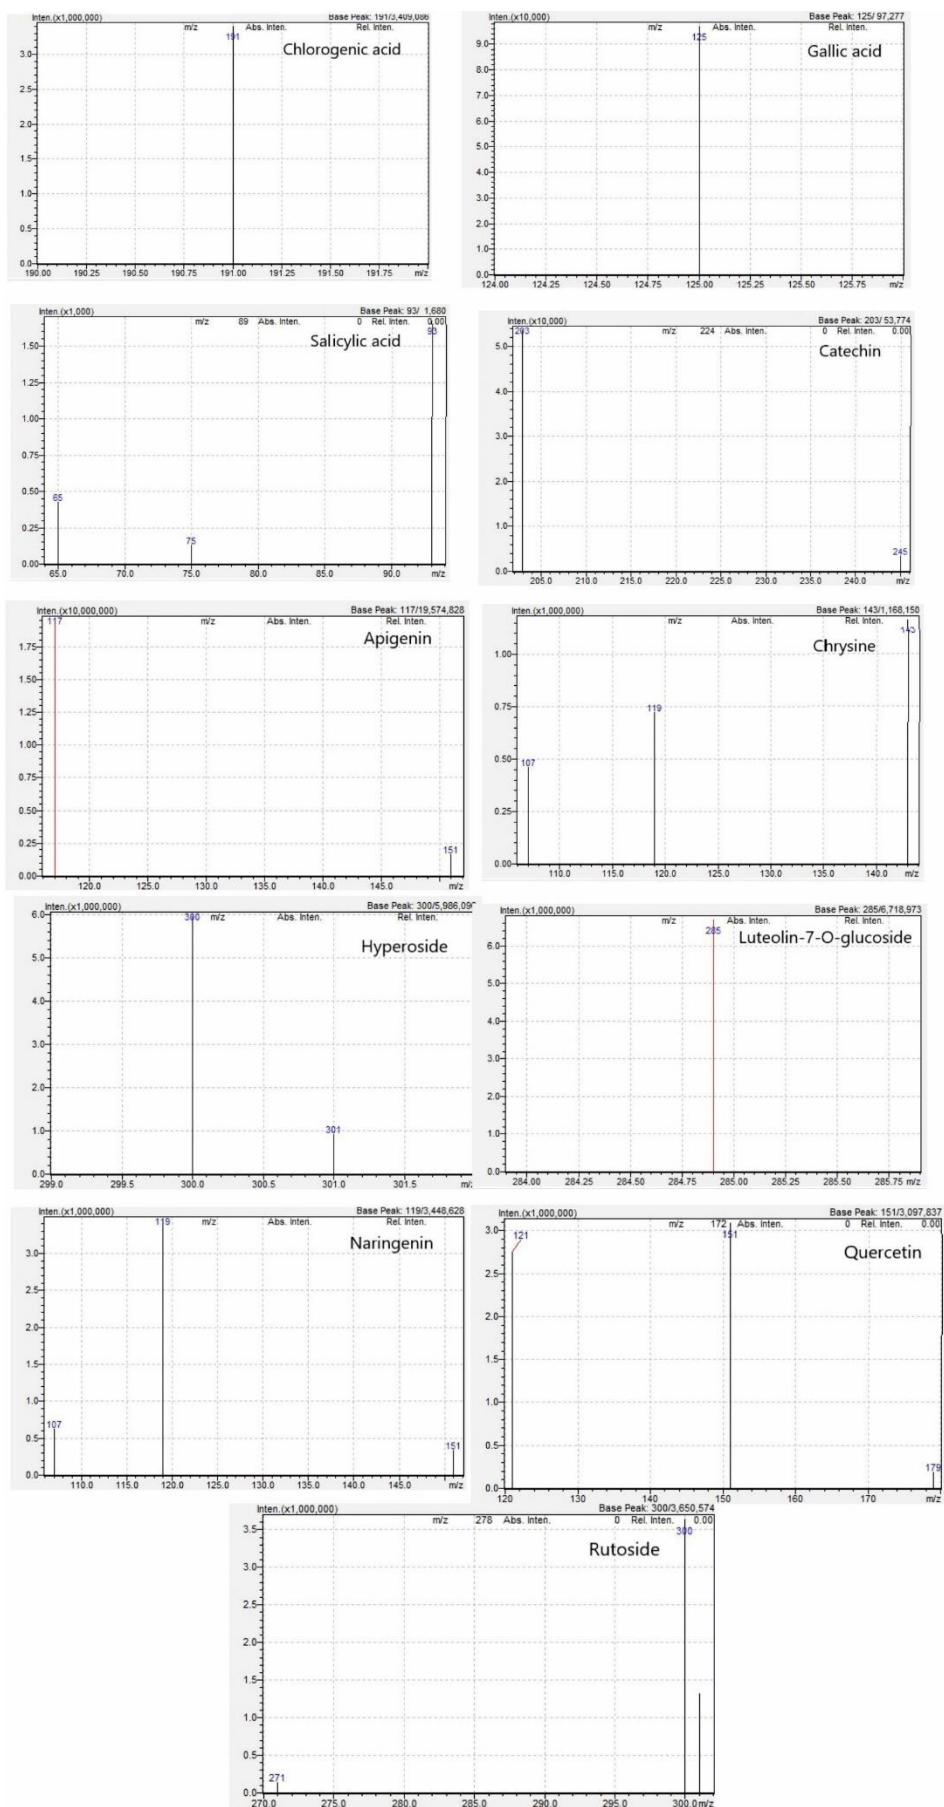

**Figure S10:** MS spectra of the standards.
